# Supplementary material
Source: PubMed Central journal article supplement (PMC1091765)
Supplement: plntcell_tpc.105.031831_2.pdf [file plntcell_tpc.105.031831_2.pdf]

**Sup. 3** Overview of published protein-protein interactions of the Arabidopsis MADS box transcription factor family.

| Interaction           | Method                                | Reference                                         | Notes                                                                                                                   | This screen |
|-----------------------|---------------------------------------|---------------------------------------------------|-------------------------------------------------------------------------------------------------------------------------|-------------|
| AP3-PI                | Immunoprecipitation                   | Goto and Meyerowitz, Genes and Development (1994) | Full-length proteins were used.                                                                                         | X           |
| AP3-PI                | Immunoprecipitation                   | Riechmann et al., PNAS (1996)                     | Full-length proteins were used.                                                                                         | X           |
| AP3-PI                | Colocalization of GUS tagged proteins | McGonigle et al., Genes and Development (1996)    | Nuclear localization upon simultaneous expression.                                                                      | X           |
| AP3-PI                | Yeast 2-hybrid                        | Yang et al., Plant Journal (2003)                 | Y2H with IKC domains. No interaction found for full-length proteins!                                                    | X           |
| AG-SEP1               | Yeast 2-hybrid immunoprecipitation    | Fan et al., Plant Journal (1997)                  | Y2H with KC-domains from both proteins. Immunoprecipitation with KC from AG and only the K domain from the AGL protein. | YES         |
| AG-SEP2               | Yeast 2-hybrid immunoprecipitation    | Fan et al., Plant Journal (1997)                  | Y2H with KC-domains from both proteins. Immunoprecipitation with KC from AG and only the K domain from the AGL protein. | YES         |
| AG-AGL6               | Yeast 2-hybrid immunoprecipitation    | Fan et al., Plant Journal (1997)                  | Y2H with KC-domains from both proteins. Immunoprecipitation with KC from AG and only the K domain from the AGL protein. | X           |
| AG-SEP3               | Yeast 2-hybrid immunoprecipitation    | Fan et al., Plant Journal (1997)                  | Y2H with KC-domains from both proteins. Immunoprecipitation with KC from AG and only the K domain from the AGL protein. | YES         |
| AG-SEP3               | Yeast 2-hybrid                        | Favaro et al., Plant Cell (2003)                  | Full-length proteins used.                                                                                              | YES         |
| AP1-AP1               | Immunoprecipitation                   | Riechmann et al., PNAS (1996)                     |                                                                                                                         | X           |
| AP1-AP3               | Immunoprecipitation                   | Riechmann et al., PNAS (1996)                     | weak interaction.                                                                                                       | X           |
| AP1-PI                | Immunoprecipitation                   | Riechmann et al., PNAS (1996)                     |                                                                                                                         | X           |
| AP1-AG                | Immunoprecipitation                   | Riechmann et al., PNAS (1996)                     |                                                                                                                         | X           |
| AP3-AP3               | Immunoprecipitation                   | Riechmann et al., PNAS (1996)                     |                                                                                                                         | X           |
| AP3-AG                | Immunoprecipitation                   | Riechmann et al., PNAS (1996)                     |                                                                                                                         | X           |
| PI-PI                 | Immunoprecipitation                   | Riechmann et al., PNAS (1996)                     |                                                                                                                         | X           |
| PI-AG                 | Immunoprecipitation                   | Riechmann et al., PNAS (1996)                     |                                                                                                                         | X           |
| AG-AG                 | Immunoprecipitation                   | Riechmann et al., PNAS (1996)                     |                                                                                                                         | X           |
| AP3-PI-SEP3           | Yeast 3-hybrid                        | Honma and Goto, Nature (2001)                     |                                                                                                                         | ND          |
| AP3-PI-AP1            | Yeast 3-hybrid                        | Honma and Goto, Nature (2001)                     |                                                                                                                         | ND          |
| AP3-PI-AG-SEP3        | Yeast 4-hybrid                        | Honma and Goto, Nature (2001)                     | For this experiment SEP3 lacking the C-domain has been used.                                                            | ND          |
| AP1-SEP3              | Yeast 2-hybrid                        | Pelaz et al., Plant Journal (2001)                | Truncated form of AP1 used, lacking part of the C-domain. SEP3-IKC domains.                                             | X           |
| AP1-SOC1              | Yeast 2-hybrid                        | Pelaz et al., Plant Journal (2001)                | Truncated form of AP1 used, lacking part of the C-domain.                                                               | YES         |
| AP1-SVP               | Yeast 2-hybrid                        | Pelaz et al., Plant Journal (2001)                | Truncated form of AP1 used, lacking part of the C-domain.                                                               | YES         |
| AP1-MAF1 (FLM, AGL27) | Yeast 2-hybrid                        | Pelaz et al., Plant Journal (2001)                | Truncated form of AP1 used, lacking part of the C-domain.                                                               | X           |
| CAL-SEP3              | Yeast 2-hybrid                        | Pelaz et al., Plant Journal (2001)                | SEP3-IKC domains.                                                                                                       | X           |
| CAL-SOC1              | Yeast 2-hybrid                        | Pelaz et al., Plant Journal (2001)                |                                                                                                                         | YES         |
| CAL-SVP               | Yeast 2-hybrid                        | Pelaz et al., Plant Journal (2001)                |                                                                                                                         | X           |
| CAL-AGL24             | Yeast 2-hybrid                        | Pelaz et al., Plant Journal (2001)                |                                                                                                                         | X           |
| SHP1-SEP3             | Yeast 2-hybrid                        | Favaro et al., Plant Cell (2003)                  |                                                                                                                         | YES         |
| SHP2-SEP3             | Yeast 2-hybrid                        | Favaro et al., Plant Cell (2003)                  |                                                                                                                         | YES         |
| STK-SEP3              | Yeast 2-hybrid                        | Favaro et al., Plant Cell (2003)                  |                                                                                                                         | YES         |
| STK-SEP3-AG           | Yeast 3-hybrid                        | Favaro et al., Plant Cell (2003)                  |                                                                                                                         | ND          |
| STK-SEP3-SHP1         | Yeast 3-hybrid                        | Favaro et al., Plant Cell (2003)                  |                                                                                                                         | ND          |
| STK-SEP3-SHP2         | Yeast 3-hybrid                        | Favaro et al., Plant Cell (2003)                  |                                                                                                                         | ND          |
| SHP1-SEP3-AG          | Yeast 3-hybrid                        | Favaro et al., Plant Cell (2003)                  |                                                                                                                         | ND          |
| SHP1-SEP3-SHP2        | Yeast 3-hybrid                        | Favaro et al., Plant Cell (2003)                  |                                                                                                                         | ND          |
| SHP2-SEP3-AG          | Yeast 3-hybrid                        | Favaro et al., Plant Cell (2003)                  |                                                                                                                         | ND          |
